# Supplementary material for: Recovering Iron Concentrate from Low-Grade Siderite Tailings Based on the Process Mineralogy Characteristics
Source: MDPI journal article supplement (doi:10.3390/min12060676), 2022-05-27
Supplement: s1 [file s1]

Archive with 1 entries (1 files):
- minerals-1746533-supplementary.pdf
